# Supplementary material
Source: PubMed Central journal article supplement (PMC3186378)
Supplement: supp_M111.285965_jbc.M111.285965-1.pdf [file supp_M111.285965_jbc.M111.285965-1.pdf]

Table 1. The sequence of primers for Quantitative-PCR analysis

| Gene        | Forward primer              | Reverse primer              |
|-------------|-----------------------------|-----------------------------|
| Mouse FGF21 | 5'- AGATCAGGGAGGATGGAACA-3' | 5' -TCAAAGTGAGGCGATCCATA-3' |
| Human FGF21 | 5'-ACCTGGAGATCAGGGAGGAT-3'  | 5'- GCACAGGAACCTGGATGTCT-3' |
